# Supplementary material for: Prospective, Unmasked Evaluation of the iStent®Inject System for Open-Angle Glaucoma: Synergy Trial
Source: PubMed Central journal article supplement — Adv Ther. 2014 Jan 23;31(2):189–201. doi: 10.1007/s12325-014-0095-y (PMC3930835; doi:10.1007/s12325-014-0095-y), 2014-01-23
Supplement: 12325_2014_95_MOESM2_ESM.pdf [file 12325_2014_95_MOESM2_ESM.pdf]

## **Appendix 1. Members of the Synergy Study Group**

Christophe Baudouin, MD,PhD, Quinze-Vingts National Ophthalmology Hospital, and Vision Institute, Paris, France; Wolfgang Behrens-Baumann, MD, Universitätsaugenklinik, Magdeburg, Germany; Jose I. Belda, MD, PhD, FEBO, Department of Ophthalmology, Hospital de Torrevieja, Alicante, Spain; Glaucoma Unit, Clinica Oftalica, Alicante, Spain; Christoph Binder, MD, Schwarzwaldaugenklinik, Schramberg, Germany; Alain Bron, MD, Service d'Ophtalmologie, CHU Hopital Général, Dijon, France; Philippe Denis, MD, Hôpital Edouard Herriot, Service d'Ophtalmologie, Lyon, France ; Burkhard Dick, MD, Universitätsaugenklinik, Knappschaftskrankenhaus, Bochum, Germany; Antonio Fea, MD, PhD, Dipartimento di Scienze Chirurgiche,Universita' di Torino, Torino, Italy; Stefano Gandolfi, MD, Universita' degli Studi di Parma, Sezione di Oftalmologia, Parma, Italy; Julián Garcia- Feijoó, Departamento de Oftalmología y ORL, Universidad Complutense de Madrid, Madrid, Spain; Helmut Höh, Augenklinik, Dietrich- Bonhoeffer- Klinikum Neubrandenburg, Neubrandenburg, Germany; Anselm Jünemann, MD, FEBO, Department of Ophthalmology, University Hospital Erlangen, Erlangen, Germany; Yves Lachkar, MD, Hopital Saint Joseph, Institute Glaucome, Paris, France; Matthias Meyner, MD, Schwarzwaldaugenklinik, Schramberg, Germany; Jean-Philippe Nordmann, MD, Centre Hospitalier, National d'Ophtalmologie des Quinze Vingts, Paris, France; Luis Pablo, MD, Hospital Universitario Miguel Servet, Servicio Oftalmologico, Zaragoza, Spain; Klaus Rohrschneider, MD, Universitätsaugenklinik Heidelberg, Heidelberg; Germany; Carlo Traverso, MD, Universita di Genova, Clinica Oculista Di.N.O.G, Genova, Italy; Lilit Voskanyan, MD, PhD, S.V. Malayan Ophthalmological Center, Yerevan, Armenia.

## Appendix 2. List of Surgeons and Number of Subjects in Synergy Study

| Investigator                               | Site                                                                          | Number of Subjects |
|--------------------------------------------|-------------------------------------------------------------------------------|--------------------|
| Lilit Voskanyan, MD PhD                    | S.V. Malayan Ophthalmological Center, Yerevan, Armenia                        | 45                 |
| Prof. Christophe Baudouin                  | Centre Hospitalier, National d'Ophtalmologie, Paris, France                   | 3                  |
| Prof. Philippe Denis                       | Hopital Edouard Herriot, Service d'Ophtalmologie, Lyon, France                | 7                  |
| Prof. Burkhard Dick                        | Universitätsaugenklinik, Knappschafts Krankenhaus, Bochum, Germany            | 2                  |
| Prof. Helmut Hoh                           | Augenklinik, Dietrick-Bonhoeffer-Klinikum, Neubrandenburg, Germany            | 5                  |
| Prof. Anselm Jünemann                      | Universitätsaugenklinik, Erlangen, Germany                                    | 3                  |
| Dres. Christoph Binder and Matthias Meyner | Schwarzwaldaugenklinik, Schramberg, Germany                                   | 3                  |
| Dr. Antonio Fea                            | Università degli Studi di Torino, Clinica Oculistica, Torino, Italy           | 12                 |
| Prof. Stefano Gandolfi                     | Università' degli Studi di Parma, Parma, Italy                                | 3                  |
| Prof. Luis Pablo                           | Hospital Universitario Miguel Servet, Servicio Oftalmologico, Zaragoza, Spain | 4                  |
| Prof. Julian Garcia-Feijoo                 | Hospital Clinico San Carlos, Madrid, Spain                                    | 6                  |
| Dr. Jose Belda                             | Hospital Torrevieja Salud, UTE, Servicio de Oftalmologia, Alicante, Spain     | 6                  |
